# Supplementary material for: Growth of three-dimensional flower-like SnS2 on g-C3N4 sheets as an efficient visible-light photocatalyst, photoelectrode, and electrochemical supercapacitance material
Source: Royal Society of Chemistry journal article supplement (doi:10.1039/c6se00049e), 2017-01-01
Supplement: c6se00049e1.pdf [file c6se00049e1.pdf]

## Supporting Information

### **Growth of three dimensional flower-like SnS<sub>2</sub> on g-C<sub>3</sub>N<sub>4</sub> sheets as an efficient visible photocatalyst, photoelectrode, and electrochemical supercapacitance material**

Sajid Ali Ansari\* and Moo Hwan Cho\*

*School of Chemical Engineering, Yeungnam University, Gyeongsan-si, Gyeongbuk 712-749, South Korea*

**Dark reaction (with catalyst) and light reaction (without catalyst)**

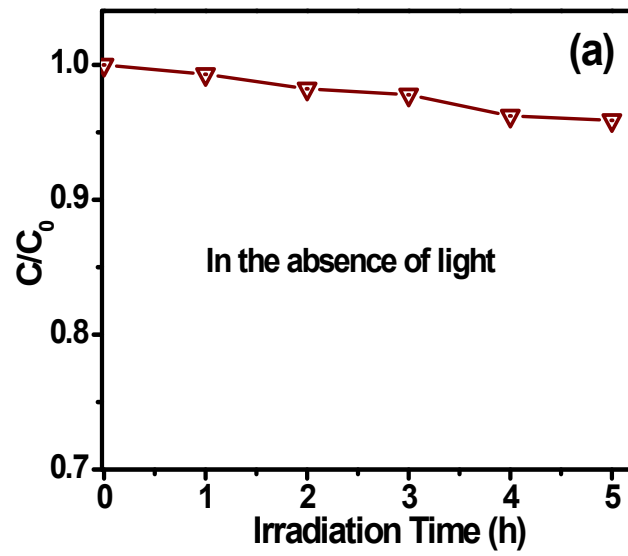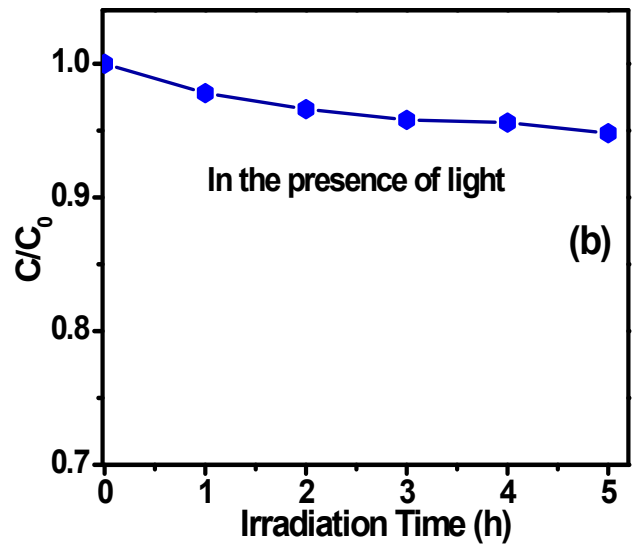

**Figure S1.** The  $C/C_0$  versus irradiation time (h) plots for RhB degradation **(a)** in absence of light (with catalyst) and **(b)** in the presence of light reaction (without catalyst).
